# Supplementary material
Source: HighWire-hosted journal article supplement (https://www.cmajopen.ca/highwire/filestream/88688/field_highwire_adjunct_files/3/open-2022-0077-4-at.pdf)
Supplement: open-2022-0077-4-at.pdf [file open-2022-0077-4-at.pdf]

Supplemental Figure 2: Cost-effectiveness acceptability curve for invasive mechanical ventilation averted (remdesivir vs. placebo - with usual care) for varying WTP thresholds

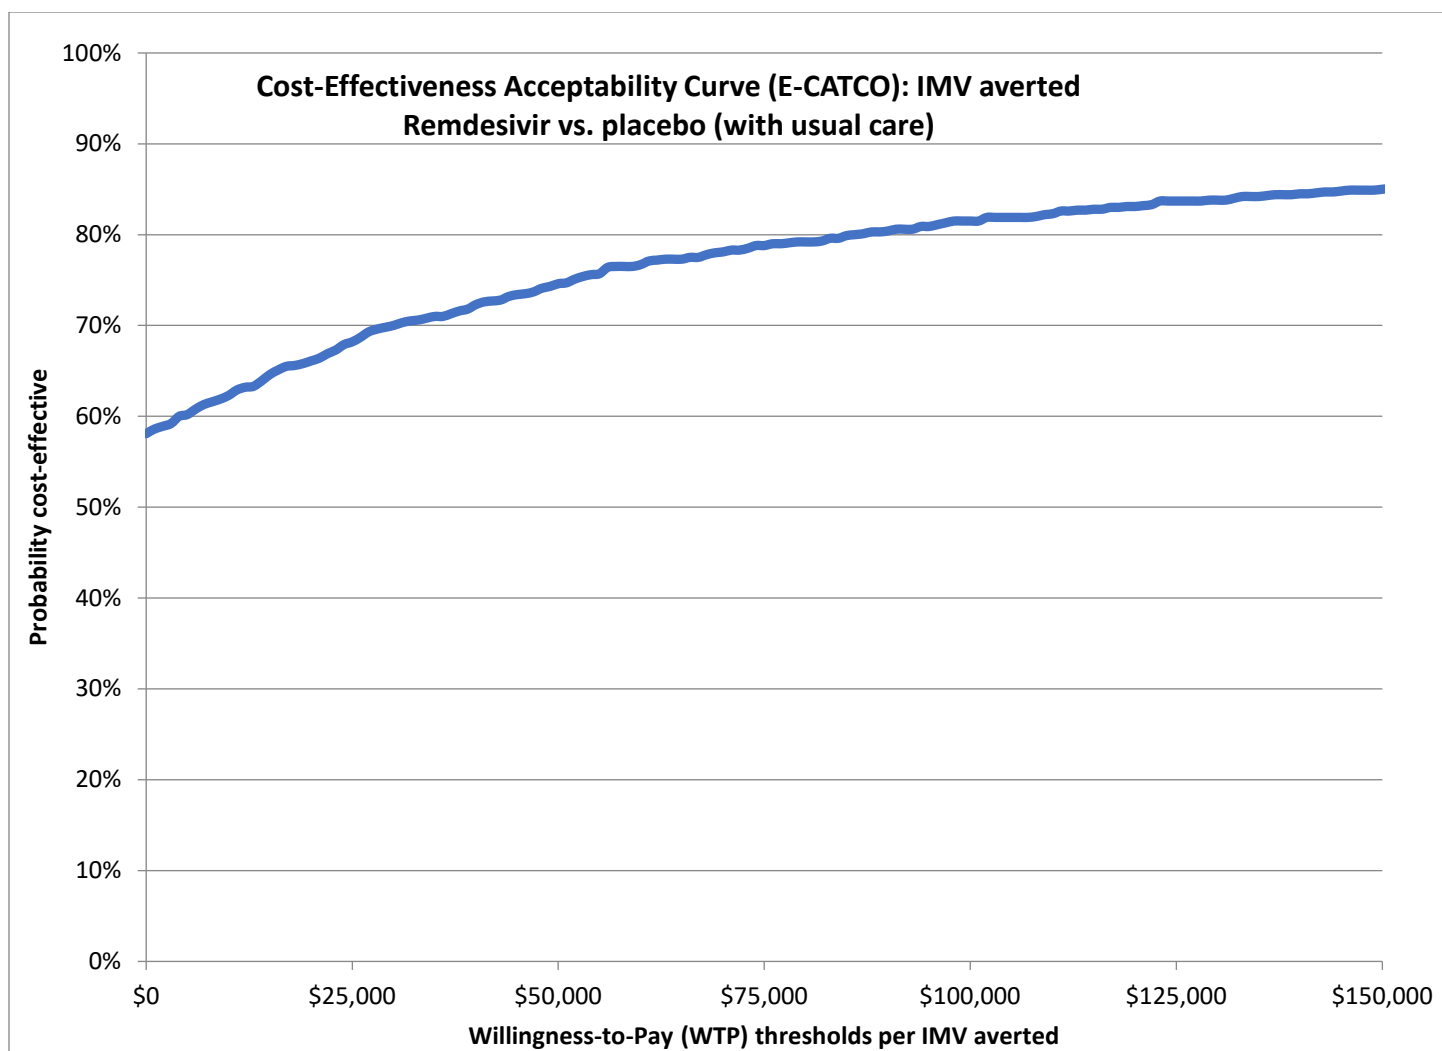

CAD = Canadian Dollar; CATCO = Canadian Treatments of COVID-19; CI = confidence interval; ICER = incremental cost-effectiveness ratio; IMV = invasive mechanical ventilation; WTP = willingness-to-pay
